# Supplementary material for: Development of a Pain Measurement Device Using Electrical Stimulation and Pressure: A Pilot Study
Source: Hindawi journal article supplement (doi:10.1155/2018/6205896), 2018-01-01
Supplement: f1 [file 6205896.f1.docx]

**
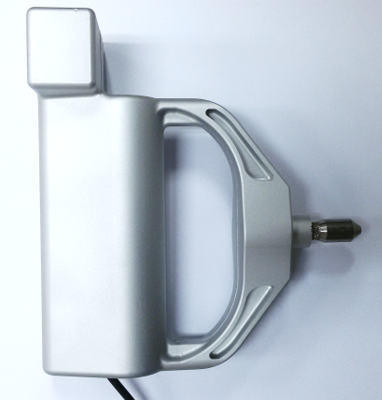

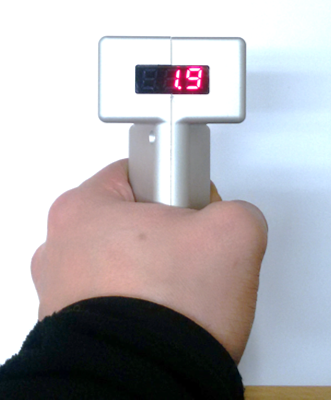
**

**Top view**

**Side view**

**Figure S1. The hand type pressure stimulator with pressure sensor and display part.**

**1h**

**2h**

**3h**

**4h**

**
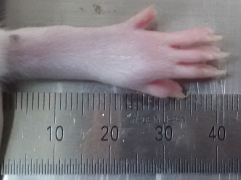

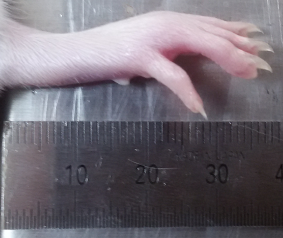

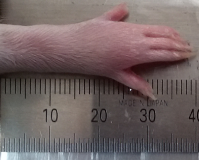

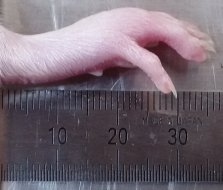

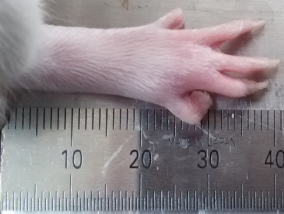

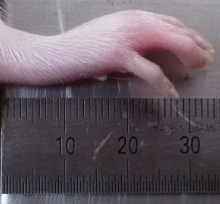

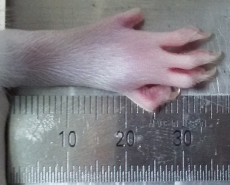

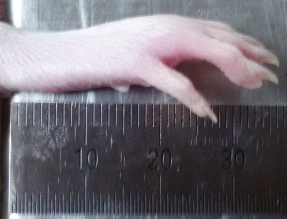

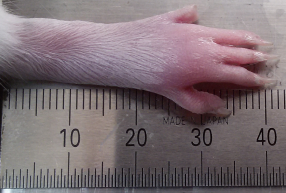

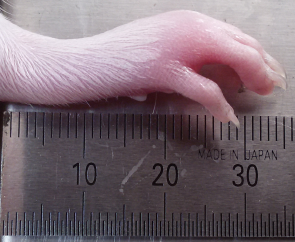

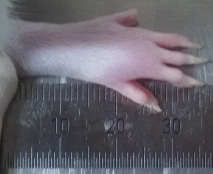

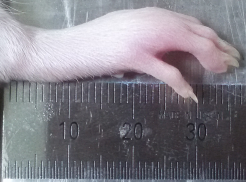

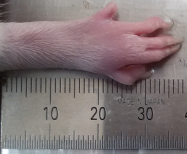

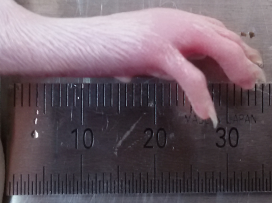

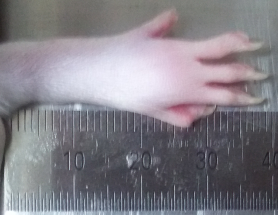

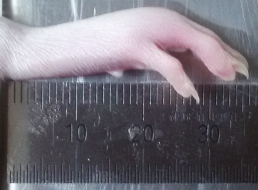
**

**Lateral View**

**Top View**

**Top View**

**Lateral View**

**8h**

**7h**

**6h**

**5h**

**Figure S2. A photography image according to time of carrageenan induced paw from the 100 µl.**

**1h**

**2h**

**3h**

**4h**

**
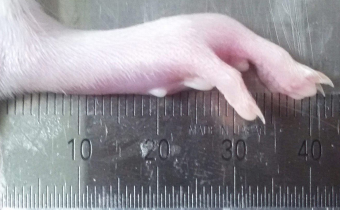

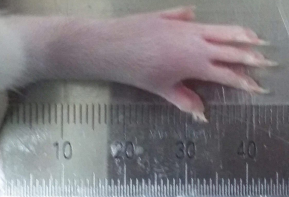

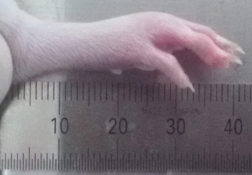

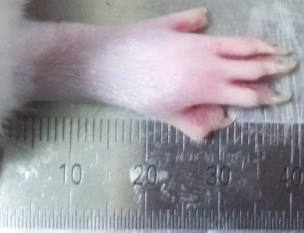

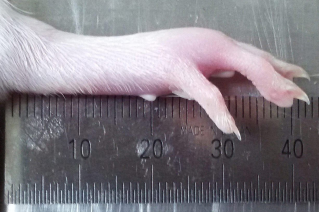

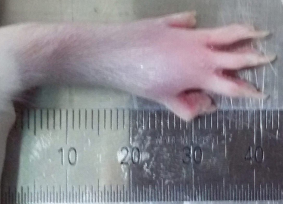

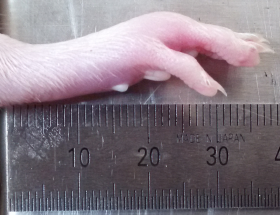

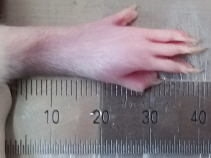

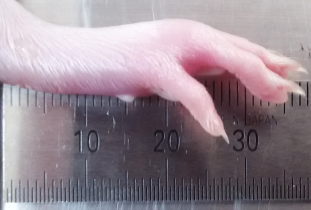

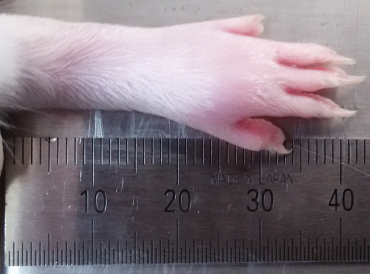

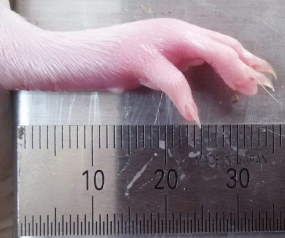

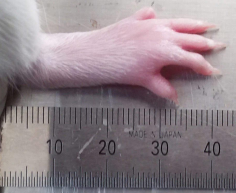

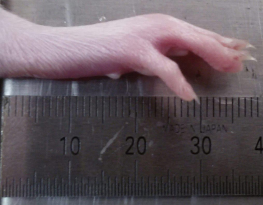

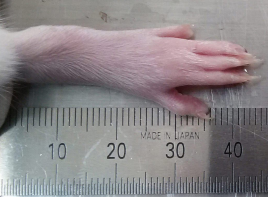

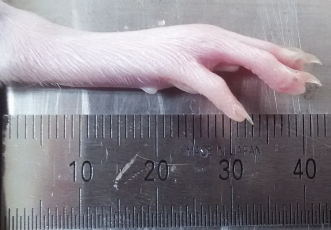

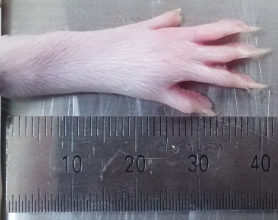
**

**Top View**

**Lateral View**

**8h**

**7h**

**6h**

**5h**

**Top View**

**Lateral View**

**Figure S3. A photography image according to time of carrageenan induced paw from the 150 µl.**

**1h**

**2h**

**3h**

**4h**

**
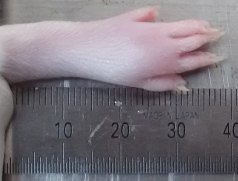

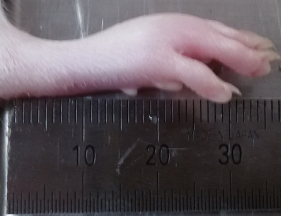

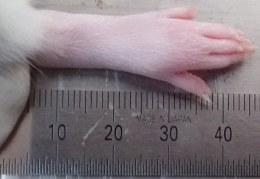

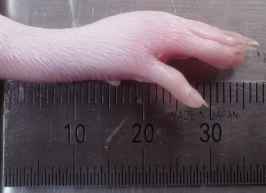

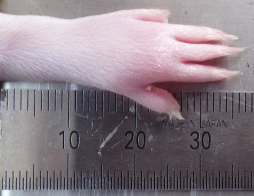

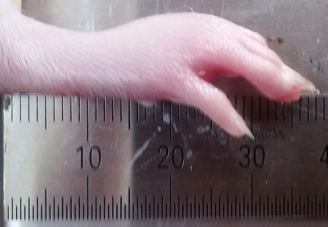

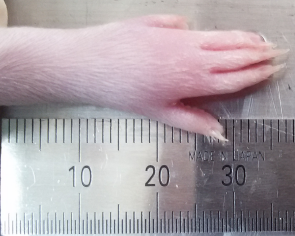

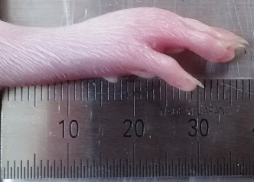

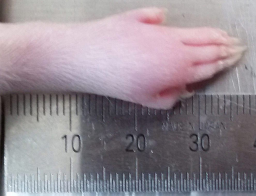

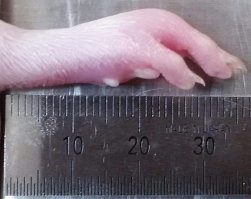

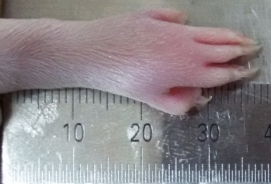

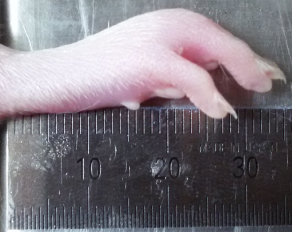

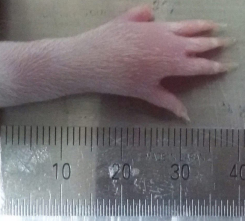

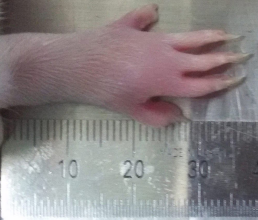

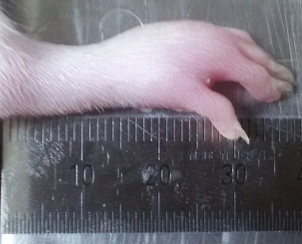

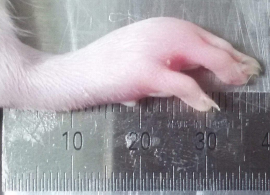
**

**Top View**

**Lateral View**

**5h**

**6h**

**7h**

**8h**

**Top View**

**Lateral View**

**Figure S4. A photography image according to time of carrageenan induced paw from the 200 µl.**
